# Supplementary material
Source: publisher figshare collection journal article supplement (https://future-science-group.figshare.com/ndownloader/files/28048914)
Supplement: Supplementary file 1 [file 28048914]

**Supplementary Tables**

**Table S1: Herringbone height measurements.**

| Height (µm) | Device 1 | Device 2 |
| --- | --- | --- |
| Cycle 1 | 177.2 ± 7.3 | 195.0 ± 13.1 |
| Cycle 2 | 175.3 ± 17.4 | 177.9 ± 8.1 |
| Cycle 3 | 146.6 ± 4.6 | 160.1 ± 9.2 |
| Cycle 4 | 162.9 ± 11.1 | 178.5 ± 12.1 |
| Cycle 5 | 178.6 ± 14.5 | 193.2 ± 11.0 |

Note: Differences in herringbone heights between devices was not statistically significant at the 5% confidence level (p=0.18).

**Table S2: Herringbone width measurements.**

| Width (µm) | Device 1 | Device 2 |
| --- | --- | --- |
| Cycle 1 | 103.4 ± 8.4 | 106.4 ± 3.6 |
| Cycle 2 | 104.5 ± 7.7 | 101.5 ± 5.7 |
| Cycle 3 | 104.6 ± 4.3 | 111.4 ± 7.9 |
| Cycle 4 | 101.6 ± 7.7 | 102.0 ± 5.9 |
| Cycle 5 | 96.6 ± 4.2 | 99.8 ± 5.8 |

**Table S3: Herringbone angle measurements.**

| Angles (degrees) | Device 1 | Device 2 |
| --- | --- | --- |
| Cycle 1 | 94.6 ± 2.6 | 96.6 ± 2.3 |
| Cycle 2 | 97.4 ± 1.0 | 94.6 ± 3.0 |
| Cycle 3 | 97.8 ± 1.2 | 96.1 ± 1.8 |
| Cycle 4 | 96.5 ± 0.7 | 95.3 ± 1.3 |
| Cycle 5 | 93.9 ± 0.7 | 94.9 ± 1.5 |

**Table S4** – Number of disfigured herringbones in each cycle for devices 1 and 2.

| Disfigured Herringbones | Device 1 | Device 2 |
| --- | --- | --- |
| Cycle 1 | 0 | 1 |
| Cycle 2 | 1 | 3 |
| Cycle 3 | 0 | 0 |
| Cycle 4 | 2 | 4 |
| Cycle 5 | 1 | 0 |
| Total | 4 | 8 |
